# Supplementary material for: Involvement of Wnt Signaling Pathways in the Metamorphosis of the Bryozoan Bugula neritina
Source: PLoS One. 2012 Mar 20;7(3):e33323. doi: 10.1371/journal.pone.0033323 (PMC3308966; doi:10.1371/journal.pone.0033323)
Supplement: Table S1 — Sequence reads from the Bugula neritina transcriptome (NCBI accession number: SRA010777.2) and the corresponding gene-specific primers. (XLSX) [file pone.0033323.s004.xlsx]

## Sheet: Sheet1
Contig no. (From B. neritina transcriptome)	Gene name	GSP name	Nucleotide sequence (5'-3')
Contig838_3	BnWnt6	WntA_3’RACE1	AGAGCTTGTCCGAAATCACAACA
		WntA_3’RACE2	ACGAAGCTGGCCGCATGACA
		WntA_5’RACE1	TCCAGCACGTCTTTACAGT
		WntA_5’RACE2	TGTCATGCGGCCAGCTTCGT
F0BWI0G03GPK3X_3	BnWnt10	WntC_3’RACE1	AGGTAGCTATGGTACTCGAGGA
		WntC_3’RACE2	TGCTGTGGCAGAGGCTTCT
		WntC_5’RACE1	AGACGGTCACCCATTCATCA
		WntC_5’RACE2	AGAAGCCTCTGCCACAGCA
Contig4642_6	BnFz4/9/10	FzA_3’RACE1	TGGCTTTCTGTTACCTCATCTATGCA
		FzA_3’RACE2	TCTCATGGTGGTAAATGGGA
		FzA_5’RACE1	AGCCACCAGACGTGGCTGGCA
		FzA_5’RACE2	TCCCATTTACCACCATGAGA
F0BWI0G03HKI38_2, F0Q158E04I6TJQ_7	BnFz5/8	FzB_3’RACE1	CCTTGCTGAAGAAGTGCGGT
		FzB_3’RACE2	GCCAACTGCGCTATGAGCTG
		FzB_5’RACE1	CAGCTCATAGCGCAGTTGGC
		FzB_5’RACE2	TAGTGTCTCCGTTGCAGGCC
F0BWI0G03G70NP_4	BnFz1	FzC_3’RACE1	TCTCATAGTTGGAATTACTTCTGGCT-
		FzC_3’RACE2	AGCAAGTTCTTCAGAAGATTAG
		FzC_5’RACE1	TACAGCGGCCTCTTGAGGCT
		FzC_5’RACE2	CTAATCTTCTGAAGAACTTGCT
Contig2179_3	BnsFRP	sFRP_3’RACE1	AGGCAACATGTTGCGAGTTTTTGT
		sFRP_3’RACE2	TGAGAATCCCCAACGTCCTTGA
		sFRP_5’RACE1	ACCTTCGCAGAGAGACCTACA
		sFRP_5’RACE2	TCAAGGACGTTGGGGATTCTCA
Contig2329_6, Contig4081_3, Contig3488_5	Bnβcat	βcat_3’RACE1	ACAGCATCAGACTATGATGTGGCA
		βcat_3’ RACE2	AGCATGATGAAATGGATGAGCAGCA
		βcat_5’RACE1	GGGATGCGTACCCAAGTCAGGC
		βcat_5’RACE2	AGCCGTGGCACCCTTCTCCT
F0Q158E04JOBE7_6	BnGSK3β	GSK_3’RACE1	TGGAGCATGTAAACATCGTGA
		GSK_3’RACE2	GCTCATGGTGTGTGCCATCG
		GSK_5’RACE1	TCACGATGTTTACATGCTCCA
		GSK_5’RACE2	CGATGGCACACACCATGAGC
Universial primer
oligodG(10)- adaptor primer			GGCCACGCGTCGACTAGTAC(g)10
oligodT(10)- adaptor primer			GGCCACGCGTCGACTAGTAC(T)17
T7 promoter-adaptor primer			TAATACGACTCACTATAGGGAGAGGCCACGCGTCGACTAGTAC
Adaptor primer			GGCCACGCGTCGACTAGTAC
